# Supplementary material for: Developmental stage-specific spontaneous activity contributes to callosal axon projections
Source: eLife. 2022 Aug 24;11:e72435. doi: 10.7554/eLife.72435 (PMC9402231; doi:10.7554/eLife.72435)
Supplement: Figure 1—figure supplement 3—source data 1. [file elife-72435-fig1-figsupp3-data1.xlsx]

## Sheet: Fig1_supple3E
P6 Ratio	P8 Ratio	P10 Ratio	P12 Ratio	P15 Ratio		ANOVA: Single Factor
0.258532	0.191103	0.256162	0.198013	0.195511
0.240181	0.211959	0.204175	0.186818	0.203352		Summary
0.190016	0.199824	0.202323	0.148171	0.19784		Groups	Count	Sum	Average	Variance
0.244738	0.213452	0.318764	0.152862	0.174924		Column 1	174	49.6475	0.28533	0.0123381
0.169063	0.258199	0.24097	0.21438	0.185018		Column 2	35	6.53271	0.186649	0.0015514
0.320463	0.26896	0.263779	0.169589	0.181792		Column 3	77	16.3703	0.212601	0.00234386
0.235316	0.291232	0.346041	0.16149	0.213373		Column 4	76	16.0468	0.211142	0.00175371
0.319674	0.169801	0.23122	0.161828	0.232505		Column 5	103	20.2583	0.196683	0.000644282
0.400755	0.148785	0.35596	0.164383	0.20279
0.322971	0.183317	0.312044	0.188714	0.210496
0.476989	0.207802	0.224077	0.227167	0.204054		ANOVA
0.27471	0.171637	0.210105	0.214658	0.241593		So. of Va.	SS	df	MS	F	P-value	F crit
0.607719	0.208708	0.192264	0.173808	0.243088		Between Groups	0.755329	4	0.188832	33.8961	8.40546e-25	2.39132
0.389821	0.216199	0.20331	0.164856	0.204246		Within Groups	2.56262	460	0.00557091
0.301549	0.179732	0.322919	0.19685	0.192411
0.313754	0.159676	0.262652	0.216878	0.232364		Total	3.31795	464
0.262239	0.14516	0.217211	0.19669	0.248265
0.297707	0.122972	0.211935	0.186193	0.207086
0.320518	0.136197	0.2661	0.157765	0.172493
0.287321	0.113771	0.266743	0.164889	0.178091
0.276285	0.181597	0.163608	0.158136	0.191545
0.221493	0.164889	0.220081	0.172673	0.183123
0.174238	0.18512	0.21266	0.194137	0.262811
0.434764	0.16329	0.186735	0.161227	0.224601
0.274708	0.167967	0.174584	0.206776	0.219086
0.222922	0.154781	0.180553	0.201947	0.211771
0.275642	0.188653	0.131664	0.185893	0.193088
0.230753	0.257557	0.152189	0.262753	0.20529
0.280018	0.181072	0.17483	0.272076	0.256694
0.324492	0.160823	0.19445	0.221886	0.246142
0.261776	0.168769	0.172487	0.265875	0.211529
0.362746	0.224953	0.178583	0.280018	0.216187
0.50641	0.184189	0.194656	0.297276	0.210187
0.479037	0.175769	0.181979	0.279359	0.175355
0.270009	0.174794	0.201258	0.27515	0.172867
0.460806		0.206454	0.21959	0.187724
0.455137		0.190863	0.172933	0.168353
0.303015		0.22937	0.212882	0.161085
0.362509		0.202499	0.175798	0.195694
0.227624		0.232841	0.186805	0.201929
0.176653		0.286322	0.201263	0.22124
0.270154		0.24972	0.21502	0.234234
0.215894		0.218549	0.211123	0.163687
0.219664		0.211963	0.220854	0.177024
0.19984		0.181524	0.237749	0.155174
0.76359		0.242976	0.228436	0.185265
0.317737		0.229682	0.219311	0.180905
0.344304		0.143092	0.248163	0.200562
0.423246		0.163419	0.273517	0.207421
0.338029		0.176653	0.235241	0.187396
0.168973		0.204674	0.204276	0.151621
0.219853		0.181023	0.155847	0.152039
0.258172		0.231496	0.157161	0.165415
0.212533		0.166418	0.236618	0.153274
0.192758		0.192072	0.243778	0.174932
0.429336		0.194222	0.244401	0.182033
0.404799		0.20152	0.338645	0.176828
0.248117		0.169069	0.272357	0.143662
0.208178		0.182933	0.275684	0.166814
0.269895		0.182897	0.216774	0.201457
0.315214		0.203271	0.219072	0.163787
0.165731		0.192676	0.205374	0.166069
0.143995		0.133276	0.253753	0.178589
0.234388		0.156017	0.222651	0.176734
0.187787		0.152689	0.293134	0.186048
0.247022		0.174424	0.206842	0.19277
0.279171		0.165019	0.208005	0.180699
0.279194		0.159262	0.198346	0.207491
0.18862		0.152784	0.198023	0.204489
0.189449		0.16229	0.252908	0.228097
0.220258		0.256927	0.253524	0.210796
0.265905		0.266414	0.148948	0.197691
0.181833		0.262655	0.161923	0.220489
0.327692		0.260515	0.187252	0.204999
0.184806		0.281048	0.161044	0.219699
0.24863		0.232654	0.19061	0.185386
0.160331		0.257068		0.227127
0.2158				0.18954
0.314367				0.183562
0.374614				0.171084
0.351175				0.171477
0.478372				0.166888
0.421292				0.166538
0.32297				0.189136
0.231701				0.174423
0.207223				0.173484
0.267837				0.174593
0.255172				0.185706
0.279372				0.195362
0.344759				0.212419
0.303804				0.213675
0.312502				0.211664
0.514807				0.216955
0.685821				0.174282
0.468514				0.185357
0.394671				0.195389
0.316922				0.20952
0.506354				0.20695
0.439219				0.242597
0.421113				0.235383
0.193987				0.24494
0.200794				0.20928
0.210835				0.209819
0.128437
0.177484
0.199199
0.212802
0.216353
0.169197
0.189512
0.172637
0.162625
0.393222
0.230011
0.231107
0.267891
0.283481
0.224918
0.250643
0.232315
0.364529
0.418795
0.285239
0.233687
0.228744
0.224389
0.248633
0.313418
0.151591
0.18169
0.165506
0.237935
0.198742
0.206236
0.171261
0.384331
0.360494
0.246709
0.542028
0.275005
0.288932
0.363673
0.292444
0.132904
0.189534
0.224303
0.199838
0.22455
0.289405
0.320164
0.37661
0.274922
0.298223
0.762814
0.416098
0.261474
0.473051
0.373602
0.141031
0.176873
0.193242
0.172392
0.186444
0.228512
0.208233
0.19089
0.163407
0.218263
0.282566
0.183088
0.27952
0.227022
0.234731
0.243762

## Sheet: Fig1_supple3D
P6 Green
887.231	1604.23	797.495	666.749	2465.49	1012.62	766.587	924.006	578.488	701.556	638.585	459.756	423.324	414.277	431.491	561.628	378.786	605.119	436.99	472.894	870.482	1522.91	1167.28	806.655	737.344	1198.18	651.205	652.586	555.618	433.912	508.163	542.502	357.194	317.693	278.317	359.044	862.858	605.751	1425.21	907.124	535.372	642.361	529.554	820.271	395.774	411.476	471.161	397.301	359.03	2382.89
P6 Red
3431.8	6679.27	4196.99	2724.34	14583.2	3159.89	3257.69	2890.46	1443.49	2172.19	1338.79	1673.6	696.577	1062.73	1430.91	1790.02	1444.43	2032.6	1363.38	1645.87	3150.66	6875.66	6699.36	1855.38	2684.1	5374.89	2362.5	2828.08	1984.23	1337.2	1941.22	1495.54	705.346	663.19	1030.77	779.165	1895.82	1999.08	3931.53	3985.19	3030.64	2377.76	2452.84	3734.21	1980.45	538.871	1482.87	1153.93	848.277	7049.35
P6 Ratio
0.258532	0.240181	0.190016	0.244738	0.169063	0.320463	0.235316	0.319674	0.400755	0.322971	0.476989	0.27471	0.607719	0.389821	0.301549	0.313754	0.262239	0.297707	0.320518	0.287321	0.276285	0.221493	0.174238	0.434764	0.274708	0.222922	0.275642	0.230753	0.280018	0.324492	0.261776	0.362746	0.50641	0.479037	0.270009	0.460806	0.455137	0.303015	0.362509	0.227624	0.176653	0.270154	0.215894	0.219664	0.19984	0.76359	0.317737	0.344304	0.423246	0.338029
P8 Green
411.923	316.888	341.022	418.445	308.53	358.388	257.348	745.71	588.653	684.885	458.42	379.744	436.284	433.846	498.095	611.846	476.579	318.329	480.5	566.672	335.517	339.462	306.872	427.769	411.459	536.134	341.75	291.244	282.525	605.367	512.716	396.477	247.856	1066.66	559.239
P8 Red
2155.51	1495.04	1706.61	1960.36	1194.93	1332.5	883.652	4391.68	3956.41	3736.06	2206.04	2212.49	2090.41	2006.7	2771.31	3831.8	3283.14	2588.63	3527.97	4980.8	1847.59	2058.72	1657.69	2619.69	2449.64	3463.82	1811.52	1130.79	1560.29	3764.18	3037.97	1762.49	1345.66	6068.55	3199.43
P8 Ratio
0.191103	0.211959	0.199824	0.213452	0.258199	0.26896	0.291232	0.169801	0.148785	0.183317	0.207802	0.171637	0.208708	0.216199	0.179732	0.159676	0.14516	0.122972	0.136197	0.113771	0.181597	0.164889	0.18512	0.16329	0.167967	0.154781	0.188653	0.257557	0.181072	0.160823	0.168769	0.224953	0.184189	0.175769	0.174794
P10 Green
264.124	398.146	454.417	194.378	241.818	222.921	196.713	405.29	177.003	206.993	386.598	407.545	395.09	568.021	267.369	272.867	347.906	385.436	226.655	241.329	564.376	372.019	253.847	573.939	661.624	464.72	965.342	1139.56	292.105	290.278	443.933	552.762	286.678	244.58	213.671	228.869	229.636	287.66	620.186	233.997	334.82	368.437	355.452	438.016	454.222	292.524	211.298	1324.35	491.749	525.241
P10 Red
1031.08	1950.02	2246	609.785	1003.52	845.107	568.466	1752.83	497.256	663.345	1725.29	1939.72	2054.93	2793.86	827.975	1038.89	1601.69	1818.65	851.766	904.727	3449.57	1690.37	1193.68	3073.54	3789.71	2573.87	7331.86	7487.79	1670.79	1492.81	2573.72	3095.27	1472.74	1344	1061.68	1108.57	1203.15	1254.13	3062.67	1004.97	1169.38	1475.4	1626.42	2066.48	2502.27	1203.92	919.961	9255.24	3009.13	2973.29
P10 Ratio
0.256162	0.204175	0.202323	0.318764	0.24097	0.263779	0.346041	0.23122	0.35596	0.312044	0.224077	0.210105	0.192264	0.20331	0.322919	0.262652	0.217211	0.211935	0.2661	0.266743	0.163608	0.220081	0.21266	0.186735	0.174584	0.180553	0.131664	0.152189	0.17483	0.19445	0.172487	0.178583	0.194656	0.181979	0.201258	0.206454	0.190863	0.22937	0.202499	0.232841	0.286322	0.24972	0.218549	0.211963	0.181524	0.242976	0.229682	0.143092	0.163419	0.176653
P12 Green
487.838	358.112	497.975	802.571	391.797	519.641	793.318	473.421	316.007	377.029	285.193	317.684	894.083	476.978	466.537	258.135	1011.67	557.42	627.311	709.182	577.313	473.817	408.827	386.2	473.776	364.001	352.746	386.221	358.987	572.166	387.999	237.499	193.942	202.806	292.541	348.944	324.508	661.338	498.273	421.45	389.332	420.35	306.724	415.15	362.368	359.299	422.737	322.517	273.617	334.222
P12 Red
2463.67	1916.9	3360.82	5250.3	1827.58	3064.12	4912.48	2925.45	1922.39	1997.88	1255.43	1479.96	5144.1	2893.3	2370.01	1190.23	5143.48	2993.78	3976.23	4300.97	3650.75	2744.01	2105.87	2395.38	2291.25	1802.46	1897.58	1469.9	1319.43	2578.65	1459.33	848.156	652.396	725.969	1063.21	1589.07	1876.49	3106.6	2834.36	2256.09	1934.45	1954.93	1452.82	1879.75	1524.16	1572.87	1927.57	1299.62	1000.36	1420.77
P12 Ratio
0.198013	0.186818	0.148171	0.152862	0.21438	0.169589	0.16149	0.161828	0.164383	0.188714	0.227167	0.214658	0.173808	0.164856	0.19685	0.216878	0.19669	0.186193	0.157765	0.164889	0.158136	0.172673	0.194137	0.161227	0.206776	0.201947	0.185893	0.262753	0.272076	0.221886	0.265875	0.280018	0.297276	0.279359	0.27515	0.21959	0.172933	0.212882	0.175798	0.186805	0.201263	0.21502	0.211123	0.220854	0.237749	0.228436	0.219311	0.248163	0.273517	0.235241
P15 Green
811.071	530.025	799.015	704.786	620.899	569.76	528.355	429.476	514.66	451.634	427.641	459.997	352.448	488.098	396.2	350.68	403.205	1245.67	1662.07	1157.83	956.39	876.16	835.343	624.71	641.7	745.88	690.718	1127.84	668.347	536.761	726.752	533.264	661.792	1039.03	657.293	724.664	574.068	442.868	486.728	464.55	394.737	336.169	633.298	833.411	682.608	438.26	326.891	359.92	305.025	469.79
P15 Red
4148.46	2606.44	4038.7	4029.11	3355.89	3134.13	2476.2	1847.17	2537.9	2145.58	2095.72	1904.02	1449.88	2389.75	2059.13	1509.18	1624.09	6015.21	9635.59	6501.33	4993.03	4784.55	3178.5	2781.42	2928.99	3522.11	3577.22	5493.87	2603.67	2180.69	3435.7	2466.68	3148.59	5925.28	3802.3	3860.26	3409.92	2749.28	2487.19	2300.56	1784.21	1435.19	3868.95	4707.9	4398.98	2365.58	1806.97	1794.55	1470.56	2506.94
P15 Ratio
0.195511	0.203352	0.19784	0.174924	0.185018	0.181792	0.213373	0.232505	0.20279	0.210496	0.204054	0.241593	0.243088	0.204246	0.192411	0.232364	0.248265	0.207086	0.172493	0.178091	0.191545	0.183123	0.262811	0.224601	0.219086	0.211771	0.193088	0.20529	0.256694	0.246142	0.211529	0.216187	0.210187	0.175355	0.172867	0.187724	0.168353	0.161085	0.195694	0.201929	0.22124	0.234234	0.163687	0.177024	0.155174	0.185265	0.180905	0.200562	0.207421	0.187396
[truncated: 124 more columns]

## Sheet: Sheet2
分散分析: 一元配置
概要
グループ	標本数	合計	平均	分散
列 1	174	49.6475	0.28533	0.0123381
列 2	35	6.53271	0.186649	0.0015514
列 3	77	16.3703	0.212601	0.00234386
列 4	76	16.0468	0.211142	0.00175371
列 5	103	20.2583	0.196683	0.000644282
分散分析表
変動要因	変動	自由度	分散	観測された分散比	P-値	F 境界値
グループ間	0.755329	4	0.188832	33.8961	8.40546e-25	2.39132
グループ内	2.56262	460	0.00557091
合計	3.31795	464
