# Supplementary material for: Developmental stage-specific spontaneous activity contributes to callosal axon projections
Source: eLife. 2022 Aug 24;11:e72435. doi: 10.7554/eLife.72435 (PMC9402231; doi:10.7554/eLife.72435)
Supplement: Figure 1—figure supplement 4—source data 1. [file elife-72435-fig1-figsupp4-data1.xlsx]

## Sheet: Fig1_supple4rev
L23	DOX E15-P15	DOX P6-P15	no DOX	RFP			L5	DOX E15-P15	DOX P6-P15	no DOX	RFP
	262.92	722.02	0	611.73				0	328.02	0	371.21
	832.12	216.01	0	702.13				252.13	0	0	329.85
	544.18	352.02	0	750.17				383.02	0	0	426
	784.15	622.66	0	656.19				604.3	263.71	0	287.37
	804.12	214.98	0	564.43				0	0	0	382.19
	726.4	237.74	0	527.5				442	0	0	214.23
	210.04	0	0	764.41				0	0	0	182.01
	479.21	99.64						352.51	86.02
		439.84							248.39
ANOVA: Single Factor								ANOVA: Single Factor
Summary								Summary
Groups	Count	Sum	Average	Variance				Groups	Count	Sum	Average	Variance
Column 1	8	4643.14	580.393	60822.1				Column 1	8	2033.96	254.245	53993.6
Column 2	9	2904.91	322.768	56013.7				Column 2	9	926.14	102.904	18866.6
Column 3	7	0	0	0				Column 3	7	0	0	0
Column 4	7	4576.56	653.794	8261.97				Column 4	7	2192.86	313.266	8133.15
ANOVA								ANOVA
So. of Va.	SS	df	MS	F	P-value	F crit		So. of Va.	SS	df	MS	F	P-value	F crit
Between Groups	1.88245e+06	3	627483	18.3467	1.0813e-06	2.96035		Between Groups	442828	3	147609	6.89897	0.00134989	2.96035
Within Groups	923436	27	34201.3					Within Groups	577688	27	21395.8
Total	2.80589e+06	30						Total	1.02052e+06	30
Tukey	diff	lwr	upr	p adj			Tukey	diff	lwr	upr	p adj
B-A	-257.625	-503.54	-11.7095	0.0374599			B-A	-151.341	-345.844	43.1634	0.169508
C-A	-580.393	-842.319	-318.466	1.02245e-05			C-A	-254.245	-461.413	-47.0774	0.0118253
D-A	73.4018	-188.524	335.328	0.868596			D-A	59.0207	-148.147	266.188	0.862987
C-B	-322.768	-577.813	-67.7227	0.00914968			C-B	-102.904	-304.63	98.8206	0.512602
D-B	331.027	75.9815	586.072	0.00734755			D-B	210.361	8.63618	412.086	0.0385813
D-C	653.794	383.278	924.31	2.4604e-06			D-C	313.266	99.3039	527.227	0.00231687

## Sheet: Fig1_supple4
		pixels
		L23	L5	average L23	average L5	n
1	DOX E15-P15	262.92	0
2		832.12	252.13
3		544.18	383.02
4		784.15	604.3
5		804.12	0
6		726.4	442
7		210.04	0
8		479.21	352.51	580.393	254.245	8
9	DOX P6-P15	722.02	328.02
10		216.01	0
11		352.02	0
12		622.66	263.71
13		214.98	0
14		237.74	0
15		0	0
16		x	x
17		99.64	86.02
18		439.84	248.39	322.768	102.904	9
19	no DOX	0	0
20		0	0
21		0	0
22		0	0
23		0	0
24		0	0
25		0	0	0	0	7
26	RFP	611.73	371.21
27		702.13	329.85
28		750.17	426
29		656.19	287.37
30		564.43	382.19
31		527.5	214.23
32		764.41	182.01	653.794	313.266	7

## Sheet: Sheet2
分散分析: 一元配置
概要
グループ	標本数	合計	平均	分散
列 1	8	4643.14	580.393	60822.1
列 2	9	2904.91	322.768	56013.7
列 3	7	0	0	0
列 4	7	4576.56	653.794	8261.97
分散分析表
変動要因	変動	自由度	分散	観測された分散比	P-値	F 境界値
グループ間	1.88245e+06	3	627483	18.3467	1.0813e-06	2.96035
グループ内	923436	27	34201.3
合計	2.80589e+06	30

## Sheet: Sheet3
分散分析: 一元配置
概要
グループ	標本数	合計	平均	分散
列 1	8	2033.96	254.245	53993.6
列 2	9	926.14	102.904	18866.6
列 3	7	0	0	0
列 4	7	2192.86	313.266	8133.15
分散分析表
変動要因	変動	自由度	分散	観測された分散比	P-値	F 境界値
グループ間	442828	3	147609	6.89897	0.00134989	2.96035
グループ内	577688	27	21395.8
合計	1.02052e+06	30
