# Supplementary material for: Developmental stage-specific spontaneous activity contributes to callosal axon projections
Source: eLife. 2022 Aug 24;11:e72435. doi: 10.7554/eLife.72435 (PMC9402231; doi:10.7554/eLife.72435)
Supplement: Figure 1—source data 1. [file elife-72435-fig1-data1.xlsx]

## Sheet: Fig1
	C	B	A			C	B	A
L2/3 / mid	Dox off	P6-15 Dox on	E15-P15 Dox on		WM / mid	Dox off	P6-15 Dox on	E15-P15 Dox on
1	0.0284259	0.907469	0.243209		1	0.335294	0.481163	0.164327
2	0.0229801	0.652431	0.621878		2	0.00715148	0.289422	0.419316
3	0.0200225	0.497942	0.539635		3	0.0474705	0.173103	0.263808
4	0.0729241	0.623759	0.782807		4	0.00137369	0.42893	0.351999
5	0.234035	0.488586	0.477283		5	0.0346151	0.381811	0.385481
6	0.00290908	0.85	1.29906		6	0.0445442	0.176602	0.739447
7	0.0107003	0.442643	0.181098		7	0.00459202	0.176596	0.343961
8		0.183201	0.438605		8		0.0985714	0.630136
9		0.210213			9		0.0649291
10		0.528018			10		1.08592
n	7	10	8		n	7	10	8
average	0.0559995	0.538426	0.572948		average	0.067863	0.335705	0.412309
SD	0.0816482	0.235906	0.351378		SD	0.119509	0.298805	0.18788
SEM	0.0308601	0.0746	0.124231		SEM	0.0451701	0.0944905	0.0664258
variance	0.00666642	0.0556516	0.123466		variance	0.0142824	0.0892845	0.0352991
Tukey	diff	lwr	upr	p adj	Tukey	diff	lwr	upr	p adj
B-A	-0.0345216	-0.335661	0.266618	0.955407	B-A	-0.0766044	-0.347415	0.194207	0.759865
C-A	-0.516948	-0.845519	-0.188378	0.0018827	C-A	-0.344446	-0.639925	-0.0489672	0.0204239
C-B	-0.482427	-0.795288	-0.169565	0.0022736	C-B	-0.267842	-0.549194	0.0135105	0.0640016
ANOVA: Single Factor								ANOVA: Single Factor
Summary								Summary
Groups	Count	Sum	Average	Variance				Groups	Count	Sum	Average	Variance
Column 1	7	0.391997	0.0559995	0.00666642				Column 1	7	0.475041	0.067863	0.0142824
Column 2	10	5.38426	0.538426	0.0556516				Column 2	10	3.35705	0.335705	0.0892845
Column 3	8	4.58358	0.572948	0.123466				Column 3	8	3.29847	0.412309	0.0352991
ANOVA								ANOVA
So. of Va.	SS	df	MS	F	P-value	F crit		So. of Va.	SS	df	MS	F	P-value	F crit
Between Groups	1.25408	2	0.62704	9.81754	0.000896596	3.44336		Between Groups	0.485409	2	0.242704	4.69882	0.0199886	3.44336
Within Groups	1.40513	22	0.0638694					Within Groups	1.13635	22	0.0516522
Total	2.65921	24						Total	1.62176	24

## Sheet: Sheet1
分散分析: 一元配置
概要
グループ	標本数	合計	平均	分散
列 1	7	0.391997	0.0559995	0.00666642
列 2	10	5.38426	0.538426	0.0556516
列 3	8	4.58358	0.572948	0.123466
分散分析表
変動要因	変動	自由度	分散	観測された分散比	P-値	F 境界値
グループ間	1.25408	2	0.62704	9.81754	0.000896596	3.44336
グループ内	1.40513	22	0.0638694
合計	2.65921	24

## Sheet: Sheet2
分散分析: 一元配置
概要
グループ	標本数	合計	平均	分散
列 1	7	0.475041	0.067863	0.0142824
列 2	10	3.35705	0.335705	0.0892845
列 3	8	3.29847	0.412309	0.0352991
分散分析表
変動要因	変動	自由度	分散	観測された分散比	P-値	F 境界値
グループ間	0.485409	2	0.242704	4.69882	0.0199886	3.44336
グループ内	1.13635	22	0.0516522
合計	1.62176	24
