# Supplementary material for: Developmental stage-specific spontaneous activity contributes to callosal axon projections
Source: eLife. 2022 Aug 24;11:e72435. doi: 10.7554/eLife.72435 (PMC9402231; doi:10.7554/eLife.72435)
Supplement: Figure 2—source data 1. [file elife-72435-fig2-data1.xlsx]

## Sheet: Fig2
	A	B	C	D	E
	Kir+DREADD_CNO P10-15	Kir+DREADD_CNO-	Kir_CNO P10-15	RFP only	Kir
#1	0.403	0.057	0.089	0.447	0.105
#2	0.615	0.156	0.069	0.457	0.016
#3	0.254	0.026	0.026	0.682	0.049
#4	0.606	0.045	0.02	0.51	0.047
#5	0.353	0.132		0.79	0.047
#6	0.358	0.113		0.655	0.027
#7	0.37	0.028		0.908	0.038
#8	0.215	0.054		0.845
#9	0.209	0.056		0.561
#10	0.167	0.057		0.66
#11	0.448
n	11	10	4	10	7
average	0.363455	0.0724	0.051	0.6515	0.047
SD	0.15082	0.0449029	0.0334365	0.16031	0.0283137
SQRT(n-1)	3.16228	3	1.73205	3	2.44949
SEM	0.0476935	0.0149676	0.0193046	0.0534368	0.011559
Tukey	diff	lwr	upr	p adj
B-A	-0.291054	-0.434477	-0.147632	1.06e-05
C-A	-0.312455	-0.504111	-0.120798	0.0003529
D-A	0.288046	0.144623	0.431468	1.28e-05
E-A	-0.316455	-0.475162	-0.157748	1.45e-05
C-B	-0.0214	-0.215595	0.172795	0.99774
D-B	0.5791	0.432302	0.725898	<0.0000001
E-B	-0.0254	-0.187164	0.136363	0.99116
D-C	0.6005	0.406305	0.794695	<0.0000001
E-C	-0.004	-0.209742	0.201742	0.999998
E-D	-0.6045	-0.766263	-0.442736	<0.0000001
ANOVA: Single Factor
Summary
Groups	Count	Sum	Average	Variance
Column 1	11	3.998	0.363455	0.0227467
Column 2	10	0.724	0.0724	0.00201627
Column 3	4	0.204	0.051	0.001118
Column 4	10	6.515	0.6515	0.0256994
Column 5	7	0.329	0.047	0.000801667
ANOVA
So. of Va.	SS	df	MS	F	P-value	F crit
Between Groups	2.4775	4	0.619374	47.2442	4.7672e-14	2.62605
Within Groups	0.485072	37	0.01311
Total	2.96257	41

## Sheet: Sheet1
分散分析: 一元配置
概要
グループ	標本数	合計	平均	分散
列 1	11	3.998	0.363455	0.0227467
列 2	10	0.724	0.0724	0.00201627
列 3	4	0.204	0.051	0.001118
列 4	10	6.515	0.6515	0.0256994
列 5	7	0.329	0.047	0.000801667
分散分析表
変動要因	変動	自由度	分散	観測された分散比	P-値	F 境界値
グループ間	2.4775	4	0.619374	47.2442	4.7672e-14	2.62605
グループ内	0.485072	37	0.01311
合計	2.96257	41
