# Supplementary material for: Developmental stage-specific spontaneous activity contributes to callosal axon projections
Source: eLife. 2022 Aug 24;11:e72435. doi: 10.7554/eLife.72435 (PMC9402231; doi:10.7554/eLife.72435)
Supplement: Figure 3—source data 1. [file elife-72435-fig3-data1.xlsx]

## Sheet: Fig3
	A	B	C
L2/3 / mid	P6-15 Dox on	P9-18 Dox on	P12-21 Dox on
1	0.907469	0.281258	0.121726
2	0.652431	0.425849	0.0329745
3	0.497942	0.0967504	0.351973
4	0.623759	0.0349786	0.383338
5	0.488586	0.0352341	0.268258
6	0.85	0.0950267	0.0112312
7	0.442643	0.0132233	0.0230516
8	0.183201	0.0756687	0.0883412
9	0.210213	0.101913	0.0281568
10	0.528018		0.0431854
n	10	9	10
average	0.538426	0.128878	0.135224
SD	0.235906	0.136065	0.144132
SEM	0.0746	0.0453551	0.0455784
variance	0.0556516	0.0185138	0.0207739
Tukey	diff	lwr	upr	p adj
B-A	-0.409548	-0.61427	-0.204826	0.0001045
C-A	-0.403203	-0.602464	-0.203941	9e-05
C-B	0.00634564	-0.198376	0.211067	0.996735
ANOVA: Single Factor
Summary
Groups	Count	Sum	Average	Variance
Column 1	10	5.38426	0.538426	0.0556516
Column 2	9	1.1599	0.128878	0.0185138
Column 3	10	1.35224	0.135224	0.0207739
ANOVA
So. of Va.	SS	df	MS	F	P-value	F crit
Between Groups	1.08126	2	0.54063	16.8151	2.05872e-05	3.36902
Within Groups	0.835939	26	0.0321515
Total	1.9172	28

## Sheet: Sheet1
分散分析: 一元配置
概要
グループ	標本数	合計	平均	分散
列 1	10	5.38426	0.538426	0.0556516
列 2	9	1.1599	0.128878	0.0185138
列 3	10	1.35224	0.135224	0.0207739
分散分析表
変動要因	変動	自由度	分散	観測された分散比	P-値	F 境界値
グループ間	1.08126	2	0.54063	16.8151	2.05872e-05	3.36902
グループ内	0.835939	26	0.0321515
合計	1.9172	28
