# Supplementary material for: Developmental stage-specific spontaneous activity contributes to callosal axon projections
Source: eLife. 2022 Aug 24;11:e72435. doi: 10.7554/eLife.72435 (PMC9402231; doi:10.7554/eLife.72435)
Supplement: Figure 4—source data 1. [file elife-72435-fig4-data1.xlsx]

## Sheet: Fig4
	A	B	C		A	B	C
	FP only	Kir Dox-	Kir Dox P6		FP only	Kir Dox-	Kir Dox P6
	H	H	H		L	L	L
animal#1	0.62	0.06	0.898485		1.26	0.64	1.74697
animal#2	2.24286	0	0.211111		2.3	0.75	1.83333
animal#3	2.4125	0.344444	1.20909		2.0875	0.766667	3.06364
animal#4	1.78889	0.2	0.67		2.46667	0.3	1.53
animal#5	1.42857	0.466667	0.32		2.67143	0.666667	1.87
average	1.69856	0.214222	0.661737		2.15712	0.624667	2.00879
H events	FP only	Kir off P6	Kir on	L events	FP only	Kir off P6	Kir on
average	1.69856	0.661737	0.214222	average	2.15712	2.00879	0.624667
SEM	0.357973	0.205481	0.0970064	SEM	0.272766	0.302132	0.0946309
n	5	5	5		5	5	5
Tukey	diff	lwr	upr	p adj	Tukey	diff	lwr	upr	p adj
B-A	-1.48434	-2.31044	-0.658245	0.0011772	B-A	-1.53245	-2.34666	-0.718246	0.0008053
C-A	-1.03683	-1.86292	-0.21073	0.0148325	C-A	-0.148331	-0.962538	0.665875	0.879175
C-B	0.447515	-0.378581	1.27361	0.350154	C-B	1.38412	0.569915	2.19833	0.0018254
ANOVA: Single Factor								ANOVA: Single Factor
Summary								Summary
Groups	Count	Sum	Average	Variance				Groups	Count	Sum	Average	Variance
Column 1	5	8.49282	1.69856	0.512579				Column 1	5	10.7856	2.15712	0.297605
Column 2	5	1.07111	0.214222	0.037641				Column 2	5	3.12333	0.624667	0.03582
Column 3	5	3.30869	0.661737	0.16889				Column 3	5	10.0439	2.00879	0.365135
ANOVA								ANOVA
So. of Va.	SS	df	MS	F	P-value	F crit		So. of Va.	SS	df	MS	F	P-value	F crit
Between Groups	5.79758	2	2.89879	12.0932	0.00132987	3.88529		Between Groups	7.14367	2	3.57184	15.3394	0.000494093	3.88529
Within Groups	2.87644	12	0.239703					Within Groups	2.79424	12	0.232853
Total	8.67402	14						Total	9.93791	14

## Sheet: Sheet1
分散分析: 一元配置
概要
グループ	標本数	合計	平均	分散
列 1	5	8.49282	1.69856	0.512579
列 2	5	1.07111	0.214222	0.037641
列 3	5	3.30869	0.661737	0.16889
分散分析表
変動要因	変動	自由度	分散	観測された分散比	P-値	F 境界値
グループ間	5.79758	2	2.89879	12.0932	0.00132987	3.88529
グループ内	2.87644	12	0.239703
合計	8.67402	14

## Sheet: Sheet2
分散分析: 一元配置
概要
グループ	標本数	合計	平均	分散
列 1	5	10.7856	2.15712	0.297605
列 2	5	3.12333	0.624667	0.03582
列 3	5	10.0439	2.00879	0.365135
分散分析表
変動要因	変動	自由度	分散	観測された分散比	P-値	F 境界値
グループ間	7.14367	2	3.57184	15.3394	0.000494093	3.88529
グループ内	2.79424	12	0.232853
合計	9.93791	14
